# Supplementary material for: Highly branched triple-chain surfactant-mediated electrochemical exfoliation of graphite to obtain graphene oxide: colloidal behaviour and application in water treatment
Source: Royal Society of Chemistry journal article supplement (doi:10.1039/d0cp01243b), 2020-01-01
Supplement: d0cp01243b1.pdf [file d0cp01243b1.pdf]

## Highly-branched Triple-chain Surfactant Mediated Electrochemical Exfoliation of Graphite to obtain Graphene Oxide: Colloidal Behaviour and Application in Water Treatment

Nur Amirah Jamaluddin<sup>a</sup>, Azmi Mohamed<sup>a,b\*</sup>, Suriani Abu Bakar<sup>b</sup>, Tretya Ardyani<sup>a</sup>, Masanobu Sagisaka<sup>c</sup>, Shota Suhara<sup>c</sup>, Mohamad Hafiz Mamat<sup>d</sup>, Mohd Khairul Ahmad<sup>e</sup>, Stephen M. King<sup>f</sup>, Sarah E. Rogers<sup>f</sup>, Julian Eastoe<sup>g</sup>

<sup>a</sup> Department of Chemistry, Faculty of Science and Mathematics, Universiti Pendidikan Sultan Idris, 35900 Tanjong Malim, Perak, Malaysia. Email: azmi.mohamed@fsmf.upsi.edu.my

<sup>b</sup> Nanotechnology Research Centre, Faculty of Science and Mathematics, Universiti Pendidikan Sultan Idris, 35900 Tanjong Malim, Perak, Malaysia

<sup>c</sup> Department of Frontier Materials Chemistry, Graduate School of Science and Technology, Hirosaki University, Bunkyo-cho 3, Hirosaki, Aomori 036-8561, Japan

<sup>d</sup> NANO-ElecTronic Centre (NET), Faculty of Electrical Engineering, Universiti Teknologi MARA (UiTM), 40450 Shah Alam, Selangor, Malaysia

<sup>e</sup> Microelectronic and Nanotechnology – Shamsuddin Research Centre (MiNT-SRC), Faculty of Electrical and Electronic Engineering, Universiti Tun Hussein Onn Malaysia, 86400 Parit Raja, Batu Pahat, Johor, Malaysia

<sup>f</sup> ISIS Pulsed Neutron & Muon Source, STFC Rutherford Appleton Laboratory, Harwell Campus, Didcot, Oxfordshire, OX11 0QT, United Kingdom

<sup>g</sup> School of Chemistry, University of Bristol, Cantock's Close, Bristol, BS8 1TS, United Kingdom

## Supplementary Information

### $^1\text{H}$ NMR Spectroscopy

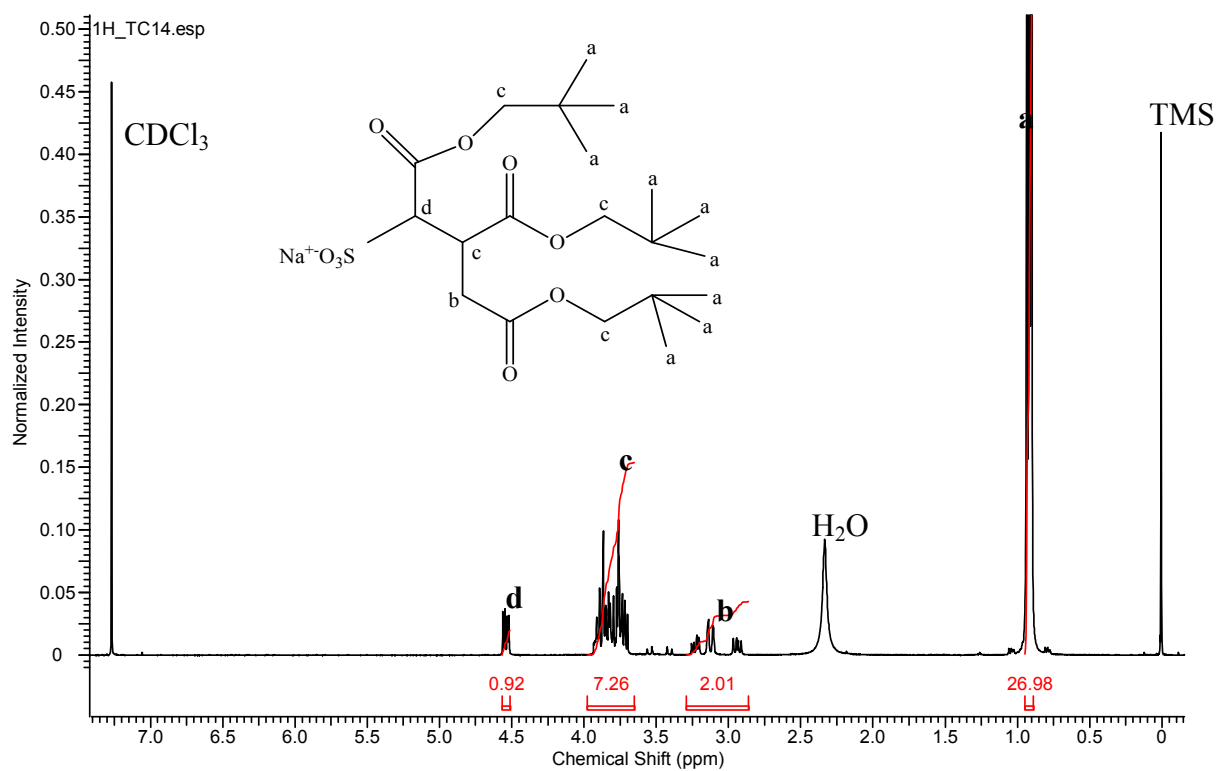

Fig. S1  $^1\text{H}$  NMR spectrum for surfactant TC14. The solvent is  $\text{CDCl}_3$ .

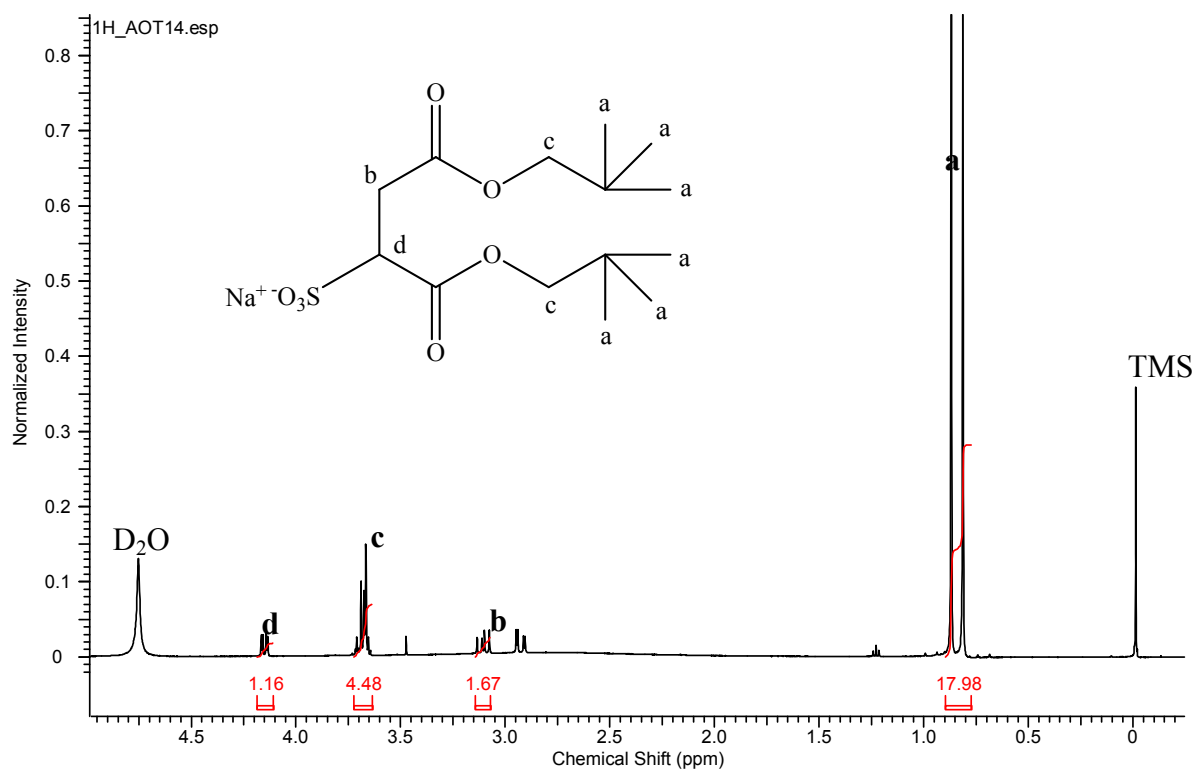

Fig. S2  $^1\text{H}$  NMR spectrum for surfactant AOT14. The solvent is  $\text{D}_2\text{O}$ .

**Table S1**

Comparison of expected and experimental  $^1\text{H}$  NMR peak integrals for surfactant TC14. Labels a to d represent the environment of each proton set in the surfactant.

| Molecular fragment     | Identified Proton | Chemical Shift | Relative NMR Integrals |          |
|------------------------|-------------------|----------------|------------------------|----------|
|                        |                   |                | Experimental           | Expected |
| CH <sub>3</sub> -C-    | a                 | 0.85 - 0.97    | 26.98                  | 27.00    |
| C-CH <sub>2</sub> -C=O | b                 | 2.87 - 3.29    | 2.01                   | 2.00     |
| C-CH <sub>2</sub> -O-  | c                 | 3.65 - 3.96    | 7.26                   | 6.00     |
| C-CH-C=O               |                   |                |                        | 1.00     |
| C-CH-C=O               | d                 | 4.52 - 4.58    | 0.92                   | 1.00     |

$^1\text{H}$  NMR (500MHz, CDCl<sub>3</sub>, TMS), ( $\delta_{\text{H}}$ /ppm): 0.85 - 0.97 (a, m, 27H), 2.87 - 3.29 (b, m, 2H), 3.65 - 3.96 (c, m, 7H), 4.52 - 4.58 (d, m, 1H)

**Table S2**

Comparison of expected and experimental  $^1\text{H}$  NMR peak integrals for surfactant AOT14. Labels a to d represent the environment of each proton set in the surfactant.

| Molecular fragment       | Identified Proton | Chemical Shift | Relative NMR Integrals |             |
|--------------------------|-------------------|----------------|------------------------|-------------|
|                          |                   |                | Experimental           | Theoretical |
| CH <sub>3</sub> -C-      | a                 | 0.77 - 0.90    | 17.98                  | 18.00       |
| O=C-CH <sub>2</sub> -C-S | b                 | 3.07 - 3.14    | 1.67                   | 2.00        |
| C-CH <sub>2</sub> -O-    | c                 | 3.64 - 3.72    | 4.48                   | 4.00        |
| C-CH-C=O                 | d                 | 4.11 - 4.18    | 1.16                   | 1.00        |

$^1\text{H}$  NMR (500MHz, CDCl<sub>3</sub>, TMS), ( $\delta_{\text{H}}$ /ppm): 0.77 - 0.90 (a, m, 18H), 3.07 - 3.14 (b, m, 2H), 3.64 - 3.72 (c, m, 4H), 4.11 - 4.18 (d, m, 1H)

## Surfactant-assisted exfoliated graphene oxide preparation

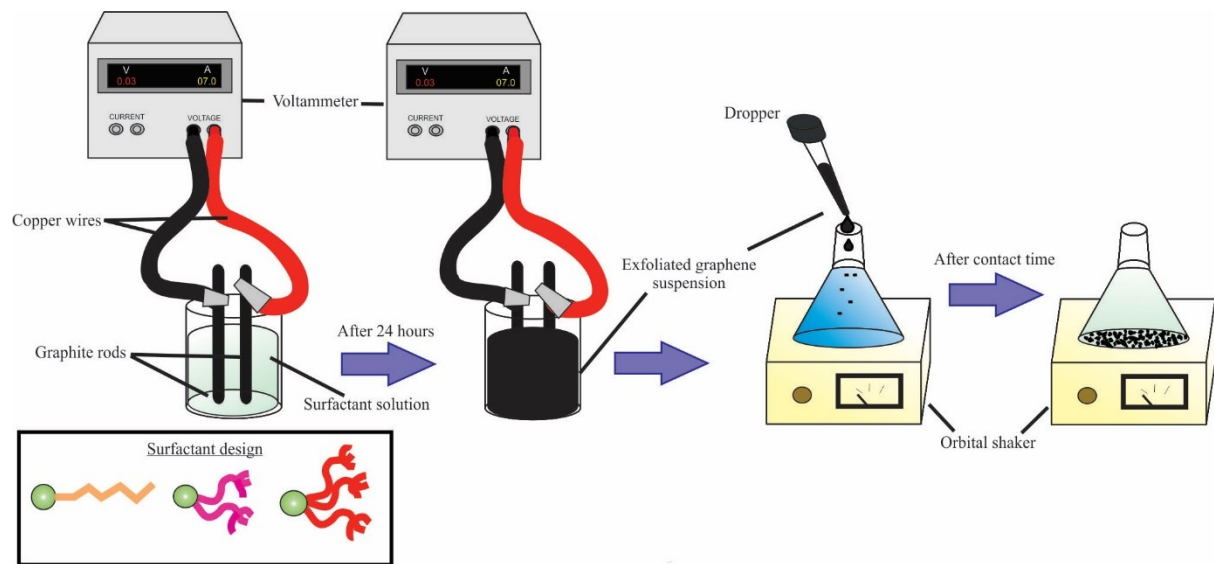

**Fig. S3** The procedure for the preparation of surfactant-assisted exfoliated graphene oxides.

**Table S3**

Compositions employed for exfoliation process and methylene blue adsorption studies.

| Surfactant<br>(0.05M in<br>50 mL<br>deionized<br>water) | Mass of<br>graphite<br>rods<br>before<br>exfoliation<br>(g) | Mass of<br>graphite<br>rods after<br>exfoliation<br>(g) | Total of<br>graphene<br>in<br>suspension<br>(mg/mL) | Volume of<br>exfoliated<br>suspension<br>used for<br>adsorption<br>studies (mL) | Initial concentration of MB (mg/L) |       |       |                                        |        |        | Total of<br>solution for<br>adsorption<br>studies (mL) |
|---------------------------------------------------------|-------------------------------------------------------------|---------------------------------------------------------|-----------------------------------------------------|---------------------------------------------------------------------------------|------------------------------------|-------|-------|----------------------------------------|--------|--------|--------------------------------------------------------|
|                                                         |                                                             |                                                         |                                                     |                                                                                 | Volume of MB (mL)                  |       |       | Total of deionized water<br>added (mL) |        |        |                                                        |
|                                                         |                                                             |                                                         |                                                     |                                                                                 | 5                                  | 10    | 15    | 5                                      | 10     | 15     |                                                        |
| TC14                                                    | 40.850                                                      | 40.433                                                  | 8.340                                               | 0.600                                                                           | 0.250                              | 0.500 | 0.750 | 24.150                                 | 23.900 | 23.650 | 25                                                     |
| AOT14                                                   | 40.770                                                      | 40.670                                                  | 2.000                                               | 2.500                                                                           | 0.250                              | 0.500 | 0.750 | 22.250                                 | 22.000 | 21.750 | 25                                                     |
| SDS                                                     | 40.760                                                      | 40.687                                                  | 1.460                                               | 3.400                                                                           | 0.250                              | 0.500 | 0.750 | 21.350                                 | 21.100 | 20.850 | 25                                                     |

## Adsorption study

**Table S4** Isotherms and calculated kinetic models for methylene blue adsorption using sEGO

| Sample     | Langmuir isotherm |                 |       | Freundlich isotherm |              |      | Pseudo first order |                            |              | Pseudo second order |                     |                 |       |
|------------|-------------------|-----------------|-------|---------------------|--------------|------|--------------------|----------------------------|--------------|---------------------|---------------------|-----------------|-------|
|            | $K_L$<br>(L/mg)   | $Q_0$<br>(mg/g) | $R^2$ | $R_L$               | $K_F$ (mg/g) | $n$  | $R^2$              | $k_1$ (min <sup>-1</sup> ) | $q_e$ (mg/g) | $R^2$               | $k_2$<br>(g/mg.min) | $q_e$<br>(mg/g) | $R^2$ |
| TC14 sEGO  | 0.39              | 2.46            | 0.99  | 0.15                | 0.30         | 0.11 | 0.89               | $8.5 \times 10^{-4}$       | 0.68         | 0.63                | 0.01                | 13.41           | 1.00  |
| AOT14 sEGO | 0.31              | 1.43            | 0.91  | 0.18                | 0.74         | 0.07 | 0.85               | $6.1 \times 10^{-4}$       | 0.69         | 0.46                | 0.08                | 10.31           | 1.00  |
| SDS sEGO   | 0.24              | 0.61            | 1.00  | 0.22                | 1.12         | 0.04 | 0.97               | $7.0 \times 10^{-4}$       | 0.78         | 0.59                | 0.05                | 5.61            | 1.00  |

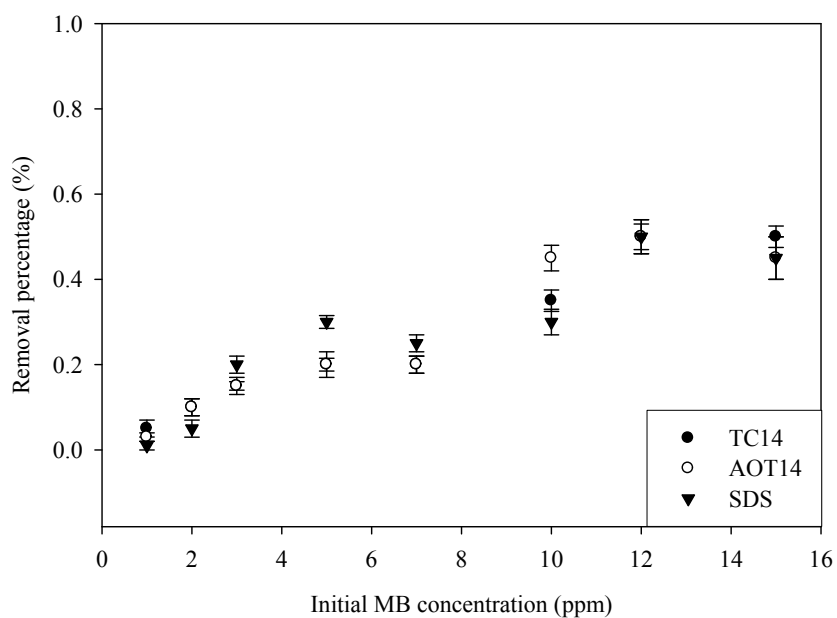

**Fig. S4.** Removal of TC14, AOT14 and SDS at various initial MB concentrations at 22.5°C and pH7 after 24 hours of contact time.

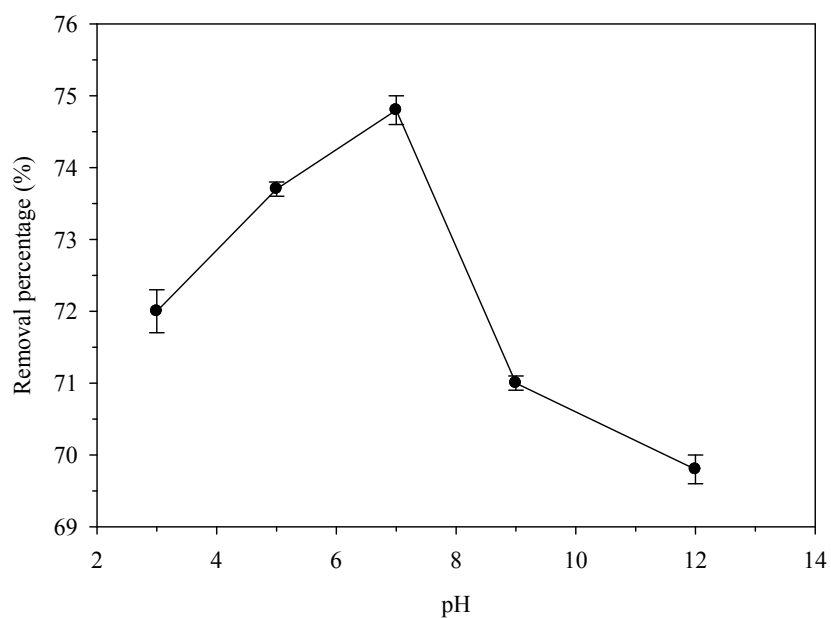

**Fig. S5.** Optimization of colloidal environment pH for adsorption studies using 5mg SDS sEGO in 15ppm MB at 22.5°C.

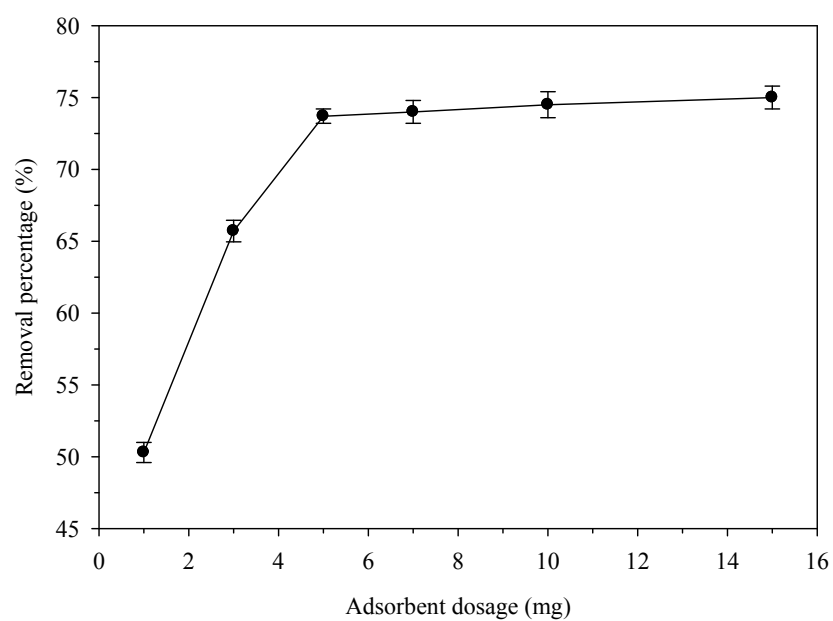

**Fig. S6.** Optimization of exfoliated sEGO mass for adsorption studies using SDS sEGO in 15 ppm MB at 22.5°C.

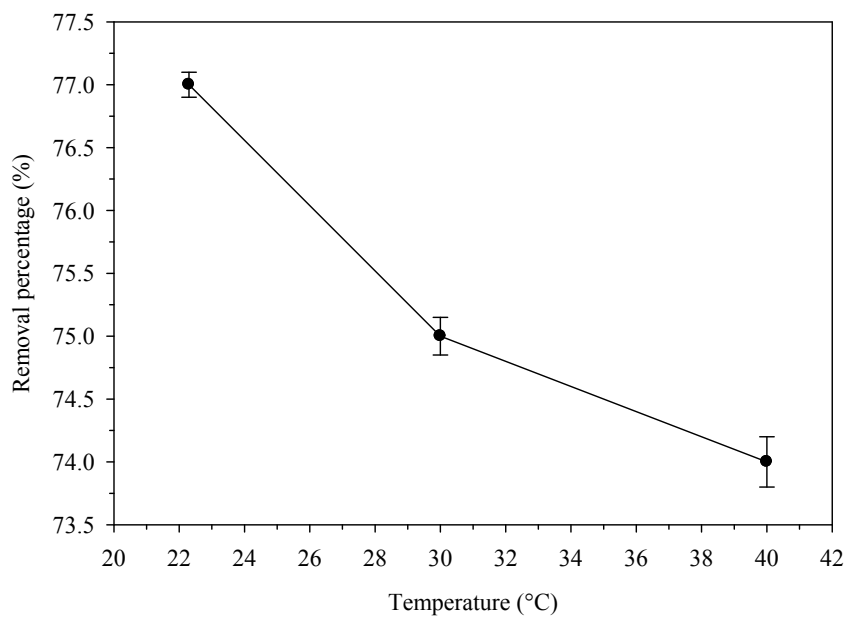

**Fig. S7.** Optimization of temperature for adsorption studies using SDS sEGO.



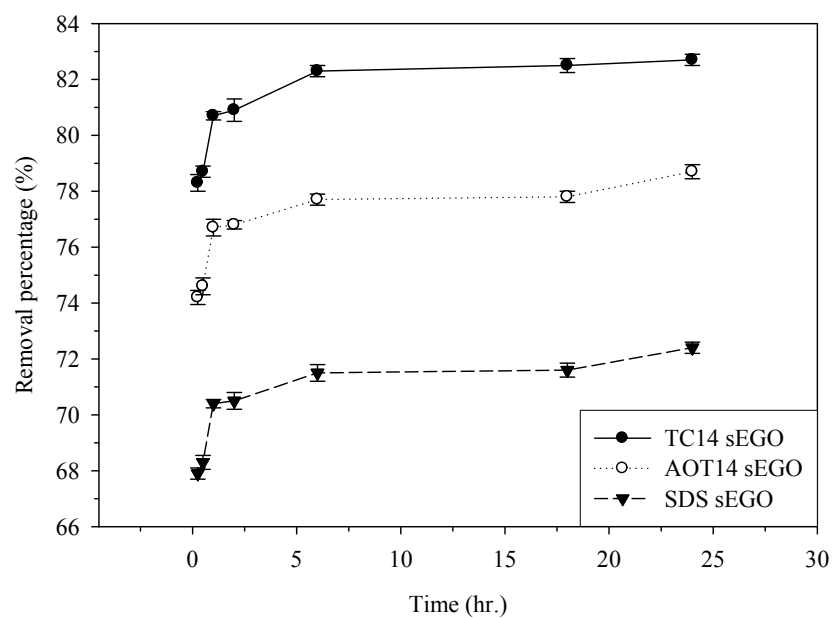

**Fig. S8.** Effect of initial dye concentration and contact time for adsorption studies on MB removal at 22.5°C.

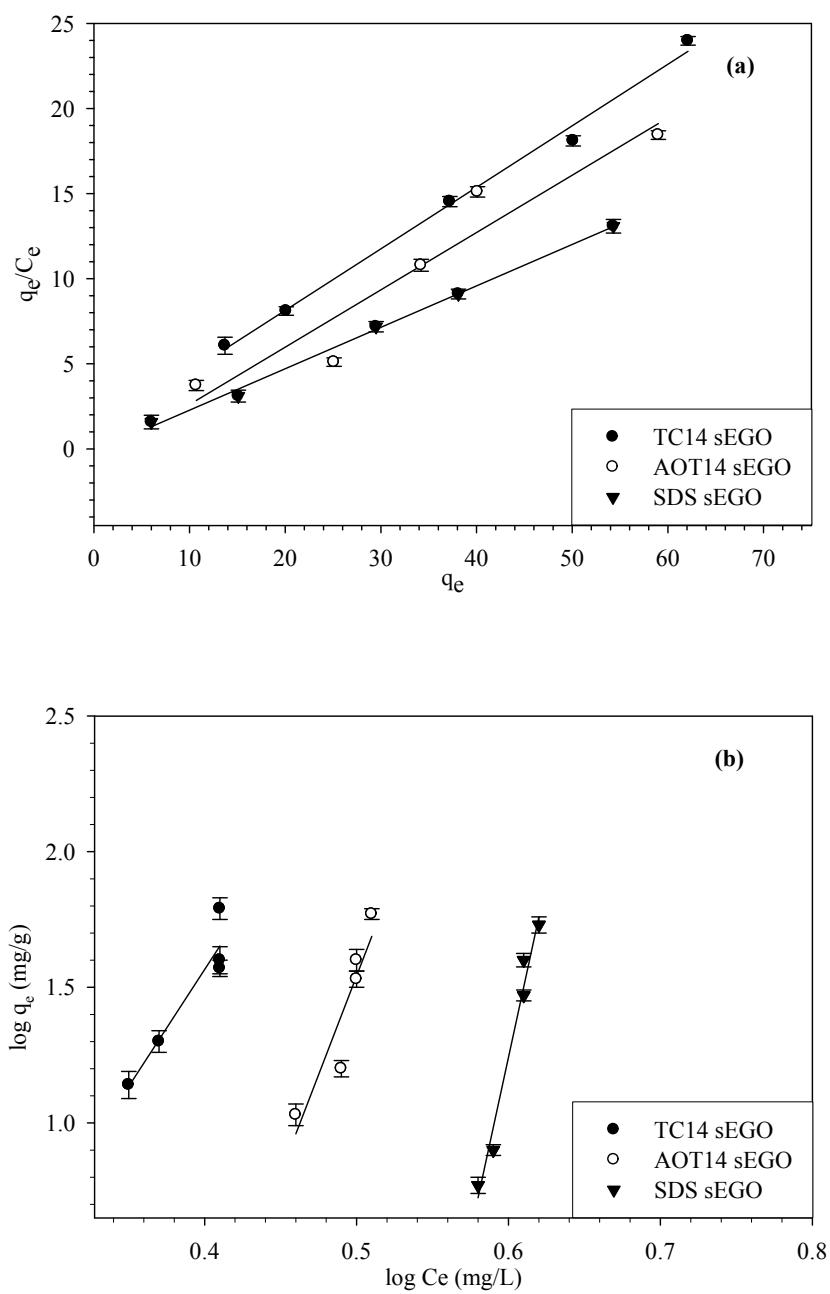

**Fig. S9.** Langmuir adsorption isotherm (a) and Freundlich model plot (b) for the adsorption of MB by the different surfactant exfoliated graphene oxides at 22.5°C.

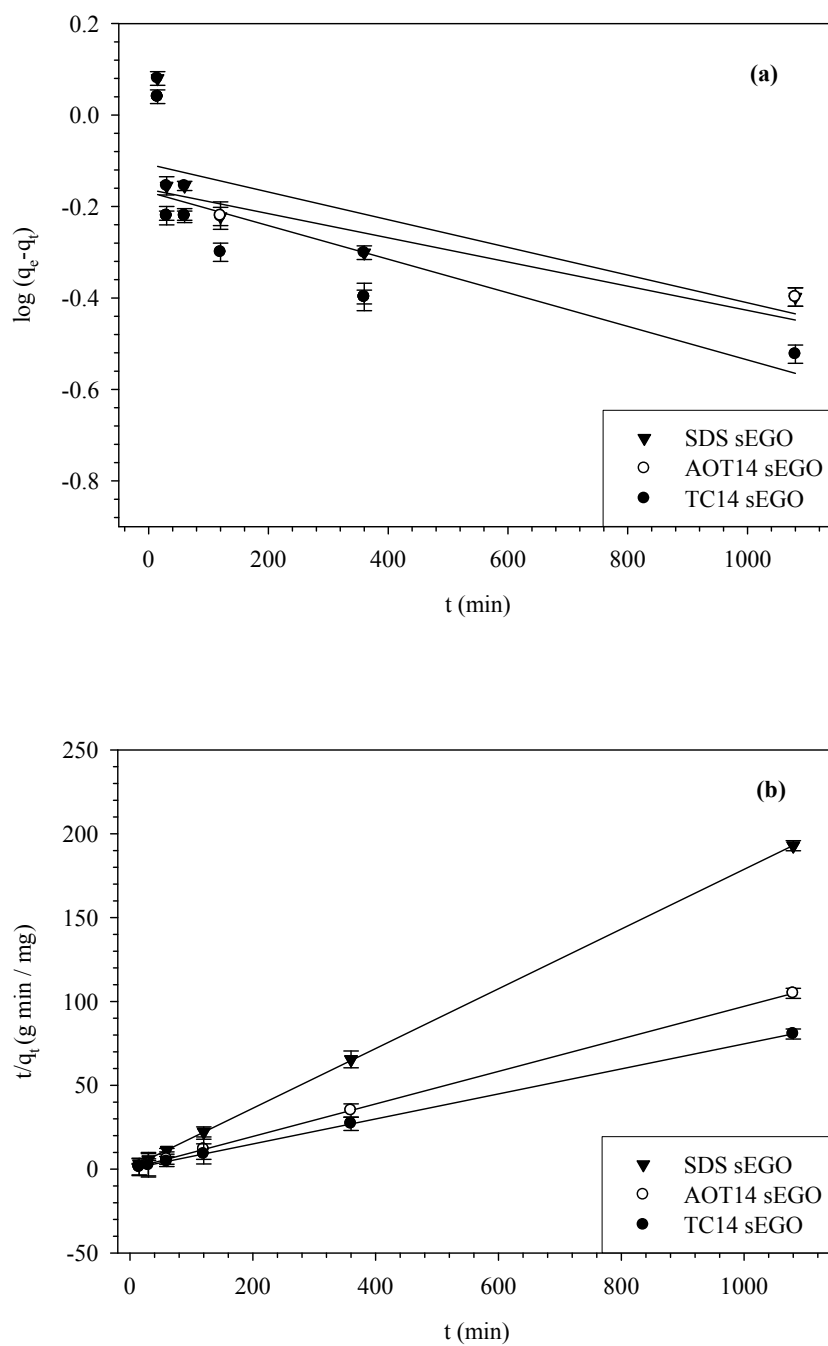

**Fig. S10.** The pseudo first-order model (a) and the pseudo second-order model (b) for the adsorption of MB by the different surfactant exfoliated graphene oxides at 22.5°C.

## Zeta-potential measurement

**Table S5**

Zeta potentials along with the degree of branching and numbers of methyl groups in the surfactants.

| Sample                | Zeta ( $\zeta$ )-potential (mV) |               | No of surfactant tails | No of terminal methyl (-CH <sub>3</sub> ) groups on each surfactant tail |
|-----------------------|---------------------------------|---------------|------------------------|--------------------------------------------------------------------------|
|                       | Prior washing                   | After washing |                        |                                                                          |
| sEGO                  | - 20 ± 1 <sup>a</sup>           | -             | -                      | -                                                                        |
| TC14 sEGO             | - 46 ± 1                        | - 46 ± 3      | 3                      | 3                                                                        |
| TC14 sEGO (below cmc) | - 30 ± 1                        | - 30 ± 1      | 3                      | 3                                                                        |
| AOT14 sEGO            | - 29 ± 1                        | - 29 ± 3      | 2                      | 3                                                                        |
| SDS sEGO              | - 21 ± 1                        | - 21 ± 3      | 1                      | 1                                                                        |

<sup>a</sup> Data collected by Zhang et al. [1]

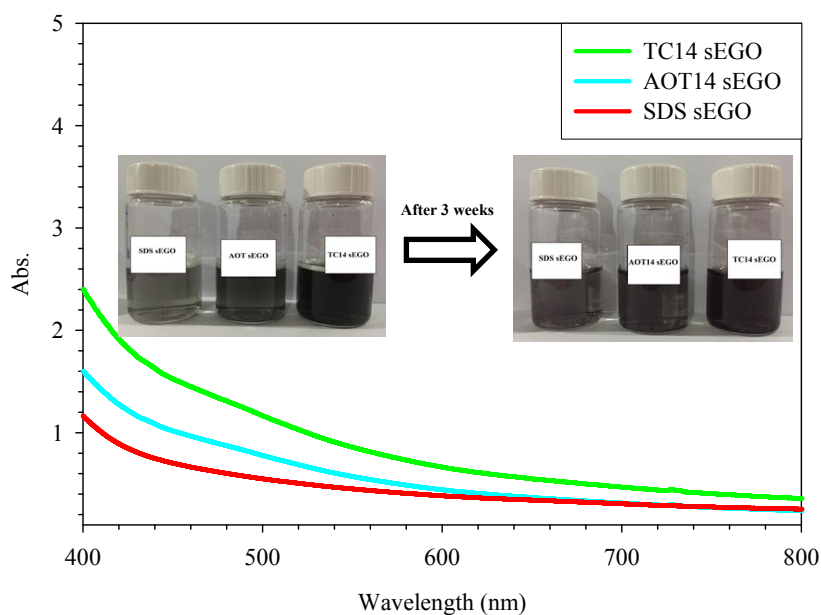

**Fig. S11.** UV Visible spectrum of TC14 sEGO, AOT14 sEGO and SDS sEGO, inset is the photograph of the sEGO suspension after exfoliation and after 3 weeks.

## SANS data model fitting in SAS View

The scattering intensity  $I(Q)$  is proportional to the product of two dimensionless functions, one describing particle size and shape (form factor,  $P(Q,r)$ ) and one describing interparticle interactions (structure factor,  $S(Q)$ ), where the particle radius is denoted as  $r$ .

$$I(Q) \propto P(Q,r)S(Q) \quad (\text{Eq. S1})$$

The 'reduced' (instrument-independent) SANS data were fitted to different models using the SasView interactive fitting program (<http://www.sasview.org/>).

Known parameters, such as scattering length densities, dielectric constants, volume fractions, and temperature, were fixed at constant values. Other parameters, such as  $r$ , were then optimized by the program until a minimum value of  $\chi^2$  was obtained. The equations for the form factors used are described as below. Further information and references can be found in the associated SasView help documentation.

### *Sphere model*

The scattering from a dispersion of homogeneous smooth spheres is given by Equation S2

$$I(Q) = \frac{scale}{V} \left[ \frac{3V(\Delta\rho)(\sin(Qr) - Qr \cos(Qr))}{(Qr)^3} \right]^2 + bkg \quad (\text{Eq. S2})$$

where *scale* is the volume fraction,  $V$  is the volume of the scatterer,  $\Delta\rho$  is the contrast (difference in scattering length density between the scatterer and dispersion medium), and *bkg* is the background level. The scattering length density of the various components are given in Table S6 below.

### *Ellipsoid model*

The form factor for ellipsoid model given by equations S3 to S5

$$P(Q, \alpha) = \frac{scale}{V} f^2(Q) + bkg \quad (\text{Eq. S3})$$

$$f(Q) = \frac{3(\Delta\rho)V(\sin[Qr(R_a, R_b, \alpha)] - Qr \cos[Qr(R_a, R_b, \alpha)])}{[Qr(R_a, R_b, \alpha)]^3} \quad (\text{Eq. S4})$$

$$r(R_a, R_b, \alpha) = [R_b^2 \sin^2 \alpha + R_a^2 \cos^2 \alpha]^{1/2} \quad (\text{Eq. S5})$$

**Table S6**

Scattering length densities ( $\rho$ ) of the components used in this study

| Compounds        | $\rho$ ( $\times 10^{-6} \text{ \AA}^{-2}$ ) |
|------------------|----------------------------------------------|
| D <sub>2</sub> O | 6.37                                         |
| sEGO             | 7.33                                         |
| SDS              | 0.37                                         |
| AOT14            | 0.48                                         |
| TC14             | 0.85                                         |

- [1] F. Zhang, S. Li, Q. Zhang, J. Liu, S. Zeng, M. Liu and D. Sun, *J. Mol. Liq.*, 2019, 276, 338–346.
